# Supplementary material
Source: Research Square preprint supplement (doi:10.21203/rs.3.rs-9071493/v1)
Supplement: Supplementary file 1 [file 960c5104e168f01f74c79668.docx]

**Genetic characterization of influenza A and B viruses circulating from 2017 to 2023 In Guizhou Province,China**

1. Supplementary Table S1: Comprehensive listing of HA antigenic site substitutions and N-linked glycosylation site variations in influenza A(H1N1) viruses.
2. Supplementary Table S2: Comprehensive listing of HA antigenic site substitutions and N-linked glycosylation site variations in influenza A(H3N2) viruses.
3. Supplementary Table S3: Comprehensive listing of HA antigenic site substitutions and N-linked glycosylation site variations in influenza B Victoria（BV）viruses.

**Supplementary Table S1.Complete list of amino acid substitutions and glycosylation site variation in influenza A(H1N1) viruses**

| Strain ID | Year | Clade | Antigenic site | | | | Glycosylati-on site | |
| --- | --- | --- | --- | --- | --- | --- | --- | --- |
| Sa | Sb | Ca | Cb | Incre-ase | Del-etion |
| A/Guizhou-Bijiang/SWL1405/2019 | 2019 | 6B.1A.1 | - | - | - | S74R | 276 NTT | - |
| A/Guizhou-Xixiu/SWL1883/2017 | 2017 | 6B.1A | S164T | - | - | S74R | - | - |
| A/Guizhou-Qingzhen/SWL131/2018 | 2018 | 6B.1A | S164T | - | - | S74R | - | - |
| A/Guizhou-Qingzhen/SWL1345/2017 | 2017 | 6B.1A | S164T | - | - | S74R | - | - |
| A/Guizhou-Qixinguan/SWL1956/2017 | 2017 | 6B.1A | S164T | - | - | S74R | 276 NTT |  |
| A/Guizhou-Xinyi/SWL138/2018 | 2018 | 6B.1A | S164T | - | - | S74R | - | - |
| A/Guizhou-Nanming/SWL11523/2017 | 2017 | 6B.1 | - | - | - | - | - | - |
| A/Guizhou-Qingzhen/SWL1353/2017 | 2017 | 6B.1 | - | - | - | - | - | - |
| A/Guizhou-Qingzhen/SWL1331/2017 | 2017 | 6B.1 | - | - | - | - | - | - |
| A/Guizhou-Qingzhen/1331/2017 | 2017 | 6B.1 | - | - | - | - | - | - |
| A/Guizhou-Qixinguan/SWL131/2017 | 2017 | 6B.1 | - | - | - | - | - | - |
| A/Guizhou-Nanming/SWL1778/2023 | 2023 | 6B.1A.5a.2a | - | - | - | - | - | - |
| A/Guizhou-Xinyi/SWL15/2019 | 2019 | 6B.1A.7 | - | T185I | - | S74R | - | - |
| A/Guizhou-Nanming/SWL140/2019 | 2019 | 6B.1A.7 | - | - | H138Y | S74R | - | - |
| A/Guizhou-Qixinguan/1104/2019 | 2019 | 6B.1A.7 | - | - | - | S74R | - | - |
| A/Guizhou-Bijiang/SWL1350/2019 | 2019 | 6B.1A.5a | - | T185I | - | S74R | - | - |
| A/Guizhou-Qingzhen/SWL1212/2019 | 2019 | 6B.1A.5a | - | T185I | - | S74R | - | - |
| A/Guizhou-Huichuan/SWL1223/2019 | 2019 | 6B.1A.5a.1 | - | T185I,D187A,Q189E | - | S74R | - | - |
| A/Guizhou-Nanming/SWL1692/2019 | 2019 | 6B.1A.5a.1 | - | T185I,D187A,Q189E | - | S74R | - | - |
| Supplementary Table S1 continues on the next page. | | | | | | | | |
| Supplementary Table S1 continued. | | | | | | | | |
| Strain ID | Year | Clade | Antigenic site | | | | Glycosylati-on site | |
| Sa | Sb | Ca | Cb | Incr-ease | Delet-ion |
| A/Guizhou-Honghuagang/SWL11033/2019 | 2019 | 6B.1A.5a.1 | - | T185I,D187A,Q189E | - | S74R | - | - |
| A/Guizhou-Nanming/SWL13303/2018 | 2018 | 6B.1A.5a | - | T185I | S164T | S74R | - | - |
| A/Guizhou-Xixiu/SWL1202/2019 | 2019 | 6B.1A.5a | - | T185I,D187V | - | S74R | - | - |
| A/Guizhou-Qingzhen/SWL1270/2019 | 2019 | 6B.1A.5a | - | T185I | - | S74R | - | - |
| A/Guizhou-Xinyi/SWL1145/2019 | 2019 | 6B.1A.5a | - | T185I | - | S74R | - | - |
| A/Guizhou-Zhongshan/SWL1514/2023 | 2023 | 6B.1A.5a.2 | - | A186T,Q189E | - | - | - | - |
| A/Guizhou-Honghuagang/SWL1267/2023 | 2023 | 6B.1A.5a.2 | - | A186T,Q189E | P137S | - | - | - |
| A/Guizhou-Honghuagang/SWL1261/2023 | 2023 | 6B.1A.5a.2 | - | A186T,Q189E | P137S | - | - | - |
| A/Guizhou-Xinyi/SWL1681/2023 | 2023 | 6B.1A.5a.2 | - | A186T,Q189E | - | - | - | - |
| A/Guizhou-Zhongshan/SWL1484/2023 | 2023 | 6B.1A.5a.2 | - | A186T,Q189E | - | - | - | - |
| A/Guizhou-Qixinguan/SWL32/2023 | 2023 | 6B.1A.5a.2 | - | A186T,Q189E | - | - | - | - |
| A/Guizhou-Anlong/SWL324/2023 | 2023 | 6B.1A.5a.2 | - | A186T,Q189E | - | - | - | - |

| **Supplementary Table S2.Complete list of amino acid substitutions and glycosylation site variation in influenza A(H3N2) viruses** | | | | | | | | | |
| --- | --- | --- | --- | --- | --- | --- | --- | --- | --- |
| Strain ID | Year | Clade | Antigenic site | | | | | Glycosylation site | |
| A | B | C | D | E | Incre-ase | Deleti-on |
| A/Guizhou-Douyun/1209/2019 | 2019 | 3C.2a2 | G142K | S159Y,S193F | - | - | - | - | - |
| A/Guizhou-Kaili/1832/2019 | 2019 | 3C.2a2 | G142K | S159Y,S193F | - | - | - | - | - |
| A/Guizhou-Nanming/1958/2018 | 2018 | 3C.2a2 | G142K | K160T,P194L | - | - | - | - | - |
| A/Guizhou-Zhongshan/124/2017 | 2017 | 3C.2a2 | R142K | K160T,P194L | - | - | - | - | - |
| A/Guizhou-Honghuagang/1808/2017 | 2017 | 3C.2a3 | T135K,S144K | K160T,P194L | - | - | - | 158NYT | 133NGT |
| A/Guizhou-Huichuan/1636/2017 | 2017 | 3C.2a3 | T135K,S144K | K160T,P194L | - | - | - | - | - |
| A/Guizhou-Xixiu/1777/2017 | 2017 | 3C.2a3 | T135K,R142S,S144K | K160T,P194L | - | - | - | - | 133NGT |
| A/Guizhou-Nanming/12448/2017 | 2017 | 3C.2a3 | T135K,R142G,S144K | K160T,P194L | - | - | - | - | 133NGT |
| A/Guizhou-Xinyi/11038/2017 | 2017 | 3C.2a3 | T135K,R142G,S144K | K160T,P194L | - | - | - | 158NYT | 133NGT |
| A/Guizhou-Zunyi/11038/2017 | 2017 | 3C.2a3 | T135K,S144K | P194L | - | - | - | - | 133NGT |
| A/Guizhou-Douyun/1790/2017 | 2017 | 3C.2a1 | T135N | P194L | - | - | - | - | 133NGT |
| A/Guizhou-Qixinguan/334/2019 | 2019 | 3C.2a1b.1b | S137F,T135K | S159Y,K160T | - | - | - | 158NYT | 126NWT,133NGT |
| A/Guizhou/34/2019 | 2019 | 3C.2a1b.1b | S137F,T135K | S159Y | D53N | - | - | - | 126NWT,133NGT |
| A/Guizhou-Honghuagang/325/2019 | 2019 | 3C.2a1b.1b | S137F,T135K | S159Y | D53N | - | - | - | 126NWT,133NGT |
| Supplementary Table S2 continues on the next page. | | | | | | | | | |
| Supplementary Table S2 continued. | | | | | | | | | |
| Strain ID | Year | Clade | Antigenic site | | | | | Glycosylation site | |
| A | B | C | D | E | increase | deletion |
| A/Guizhou-Bijiang/1418/2019 | 2019 | 3C.2a1b.1b | S137F,T135K | S159Y,K160T | - | - | - | 158NYT | 126NWT,133NGT |
| A/Guizhou-Bijiang/1351/2019 | 2019 | 3C.2a1b.1b | S137F,T135K | S159Y,K160T | - | - | - | 158NYT | 126NWT,133NGT |
| A/Guizhou-Bijiang/1323/2019 | 2019 | 3C.2a1b.1b | S137F,T135K | N158K,S159Y,K160T | - | - | - | - | 126NWT,133NGT |
| A/Guizhou-Xinyi/354/2019 | 2019 | 3C.2a1b.1b | S137F,T135K | S159Y,K160T | - | - | - | 158NYT | 126NWT,133NGT |
| A/Guizhou-Kaili/15/2019 | 2019 | 3C.2a1b.2 | - | N158K,S159Y,K160T,S193F | - | - | - | - | - |
| A/Guizhou-Nanming/147/2019 | 2019 | 3C.2a1b.2 | - | S159Y,K160T,S193F | - | - | - | 158NYT | - |
| A/Guizhou-Nanming/132/2019 | 2019 | 3C.2a1b.2 | - | S159Y,K160T,S193F | - | - | - | 158NYT | - |
| A/Guizhou-Nanming/1139/2019 | 2019 | 3C.2a1b.2 | - | S159Y,K160T,S193F | - | - | - | 158NYT | - |
| A/Guizhou-Xixiu/11179/2018 | 2018 | 3C.2a1b.2 | - | P194L | - | - | - | - | - |
| A/Guizhou-Qingzhen/1110/2019 | 2019 | 3C.2a1b.2 | - | S159Y,K160I,S193F | - | - | - | - | - |
| A/Guizhou-Meitan/32/2023 | 2023 | 3C.2a1b.2a.2a.3a.1 | I140K | S156H,I192F,S198P | G53N | - | - | 94NSS | 126NWT |
| A/Guizhou-Meitan/311/2023 | 2023 | 3C.2a1b.2a.2a.3a.1 | I140K | S156H,I192F,S198P | G53N | - | - | 94NSS | 126NWT |
| Supplementary Table S2 continues on the next page. | | | | | | | | | |
| Supplementary Table S2 continued. | | | | | | | | | |
| Strain ID | Year | Clade | Antigenic site | | | | | Glycosylation site | |
| A | B | C | D | E | increase | deletion |
| A/Guizhou-Nanming/325/2023 | 2023 | 3C.2a1b.2a.2a.3a.1 | I140K | S156H,I192F,S198P | G53N | - | - | 94NSS | - |
| A/Guizhou-Nanming/3181/2023 | 2023 | 3C.2a1b.2a.2a.3a.1 | I140K | S156H,I192F,S198P | G53N | - | - | 94NSS | - |
| A/Guizhou-Douyun/1230/2023 | 2023 | 3C.2a1b.2a.2a.3a.1 | I140K | S156H,I192F,S198P | G53N | - | - | 94NSS | - |
| A/Guizhou-jinping/325/2022 | 2022 | 3C.2a1b.2a.1a | - | N159Y,I160T,N190D | G53D | - | - | 158NYT | - |
| A/Guizhou-congjiang/311/2022 | 2022 | 3C.2a1b.2a.1a | - | N159Y,I160T,N190D | G53D | - | - | 158NYT | - |
| A/Guizhou-jinping/318/2022 | 2022 | 3C.2a1b.2a.1a | - | N159Y,I160T,N190D | G53D | - | - | 158NYT | - |
| A/Guizhou-jinping/324/2022 | 2022 | 3C.2a1b.2a.1a | - | N159Y,I160T,N190D | G53D | - | - | 158NYT | - |
| A/Guizhou-Kaili/1540/2022 | 2022 | 3C.2a1b.2a.1a | - | N159Y,I160T,N190D | G53D | - | - | 158NYT | - |
| A/Guizhou-kaili/1352/2022 | 2022 | 3C.2a1b.2a.1a | - | N159Y,I160T,N190D | G53D | - | - | 158NYT | - |
| A/Guizhou-congjiang/314/2022 | 2022 | 3C.2a1b.2a.1a | - | N159Y,I160T,N190D | G53D | - | - | 158NYT | - |
| A/Guizhou-congjiang/39/2022 | 2022 | 3C.2a1b.2a.1a | - | N159Y,I160T,N190D | G53D | - | - | 158NYT | - |
| A/Guizhou-congjiang/313/2022 | 2022 | 3C.2a1b.2a.1a | - | N159Y,I160T,N190D | G53D | - | - | 158NYT | - |
| Supplementary Table S2 continues on the next page. | | | | | | | | | |
| Supplementary Table S2 continued. | | | | | | | | | |
| Strain ID | Year | Clade | Antigenic site | | | | | Glycosylation site | |
| A | B | C | D | E | increase | deletion |
| A/Guizhou-kaili/1363/2022 | 2022 | 3C.2a1b.2a.1a | - | N159Y,I160T,N190D | G53D | - | - | 158NYT | - |
| A/Guizhou-kaili/1360/2022 | 2022 | 3C.2a1b.2a.1a | S143A | N159Y,I160T,N190D | G53D | - | - | 158NYT | - |
| A/Guizhou-kaili/1361/2022 | 2022 | 3C.2a1b.2a.1a | S143A | N159Y,I160T,N190D | G53D | - | - | 158NYT | - |
| A/Guizhou-Zhongshan/1677/2022 | 2022 | 3C.2a1b.2a.1a | - | N158K,N159Y,I160T,N190D | G53D | - | - | - | - |
| A/Guizhou-jinping/322/2022 | 2022 | 3C.2a1b.2a.1a | - | N159Y,I160T,N190D | G53D | - | - | 158NYT | - |
| A/Guizhou-congjiang/312/2022 | 2022 | 3C.2a1b.2a.1a | - | N159Y,I160T,N190D | G53D | - | - | 158NYT | - |
| A/Guizhou-Zhongshan/1680/2022 | 2022 | 3C.2a1b.2a.1a | - | N159Y,I160T,N190D | G53D | - | - | 158NYT | - |
| A/Guizhou-jinping/323/2022 | 2022 | 3C.2a1b.2a.1a | - | N159Y,I160T,N190D | G53D | - | - | 158NYT | - |
| A/Guizhou-kaili/1358/2022 | 2022 | 3C.2a1b.2a.1a | - | N159Y,I160T,N190D | G53D | - | - | 158NYT | - |
| A/Guizhou-kaili/1355/2022 | 2022 | 3C.2a1b.2a.1a | - | N159Y,I160T,N190D | G53D | - | - | 158NYT | - |
| A/Guizhou-Kaili/1565/2022 | 2022 | 3C.2a1b.2a.1a | - | N159Y,I160T,N190D | G53D | - | - | 158NYT | - |
| A/Guizhou-Guanlingbuyizumiaozuzizhi/340/2022 | 2022 | 3C.2a1b.2a.1a | - | N159Y,I160T,N190D | G53D | - | - | 158NYT | - |
| Supplementary Table S2 continues on the next page. | | | | | | | | | |
| Supplementary Table S2 continued. | | | | | | | | | |
| Strain ID | Year | Clade | Antigenic site | | | | | Glycosylation site | |
| A | B | C | D | E | increase | deletion |
| A/Guizhou-Anlong/319/2022 | 2022 | 3C.2a1b.2a.1a | - | N159Y,I160T,N190D | G53D | - | - | 158NYT | 246NST |
| A/Guizhou-xinyi/1728/2022 | 2022 | 3C.2a1b.2a.1a | - | N159Y,I160T,N190D | G53D | - | - | 158NYT | - |
| A/Guizhou-Liuzhite/315/2022 | 2022 | 3C.2a1b.2a.1a | - | N159Y,I160T,N190D | G53D | - | - | 158NYT | - |
| A/Guizhou-Zhongshan/1533/2022 | 2022 | 3C.2a1b.2a.1a | - | N159Y,I160T,N190D | G53D | - | - | 158NYT | - |
| A/Guizhou-xinyi/1769/2022 | 2022 | 3C.2a1b.2a.1a | - | N159Y,I160T,N190D | G53D | - | - | 158NYT | - |
| A/Guizhou-Liuzhite/326/2022 | 2022 | 3C.2a1b.2a.1a | - | N159Y,I160T,N190D | G53D | - | - | - | - |
| A/Guizhou-xinyi/1766/2022 | 2022 | 3C.2a1b.2a.1a | - | N159Y,I160T,N190D | G53D | - | - | 158NYT | - |
| A/Guizhou-xinyi/1759/2022 | 2022 | 3C.2a1b.2a.1a | - | N159Y,I160T,N190D | G53D | - | - | 158NYT | - |
| A/Guizhou-Guanlingbuyizumiaozuzizhi/326/2022 | 2022 | 3C.2a1b.2a.1a | - | N159Y,I160T,N190D | G53D | - | - | 158NYT | - |
| A/Guizhou-xinyi/1727/2022 | 2022 | 3C.2a1b.2a.1a | - | N159Y,I160T,N190D | G53D | - | - | 158NYT | - |
| A/Guizhou-liuzhite/320/2022 | 2022 | 3C.2a1b.2a.1a | - | N159Y,I160T,N190D | G53D | - | - | 158NYT | - |
| A/Guizhou-Liuzhite/311/2022 | 2022 | 3C.2a1b.2a.1a | - | N159Y,I160T,N190D | G53D | - | - | - | - |
| Supplementary Table S2 continues on the next page. | | | | | | | | | |
| Supplementary Table S2 continued. | | | | | | | | | |
| Strain ID | Year | Clade | Antigenic site | | | | | Glycosylation site | |
| A | B | C | D | E | increase | deletion |
| A/Guizhou-Xixiu/31/2022 | 2022 | 3C.2a1b.2a.1a | - | N159Y,I160T,N190D | G53D | - | - | 158NYT | - |
| A/Guizhou-liuzhite/317/2022 | 2022 | 3C.2a1b.2a.1a | - | N159Y,I160T,N190D | G53D | - | - | 158NYT | - |
| A/Guizhou-Liuzhite/343/2022 | 2022 | 3C.2a1b.2a.1a | - | N159Y,I160T,N190D | G53D | - | - | - | - |
| A/Guizhou-Liuzhite/318/2022 | 2022 | 3C.2a1b.2a.1a | - | N159Y,I160T,N190D | G53D | - | - | 158NYT | - |
| A/Guizhou-liuzhite/312/2022 | 2022 | 3C.2a1b.2a.1a | - | N159Y,I160T,N190D | G53D | - | - | 158NYT | - |
| A/Guizhou-liuzhite/323/2022 | 2022 | 3C.2a1b.2a.1a | - | N159Y,I160T,N190D | G53D | - | - | 158NYT | - |
| A/Guizhou-Liuzhite/328/2022 | 2022 | 3C.2a1b.2a.1a | - | N159Y,I160T,N190D | G53D | - | - | 158NYT | - |
| A/Guizhou-Liuzhite/325/2022 | 2022 | 3C.2a1b.2a.1a | - | N159Y,I160T,N190D | G53D | - | - | 158NYT | - |
| A/Guizhou-xinyi/1715/2022 | 2022 | 3C.2a1b.2a.1a | - | N159Y,I160T,N190D | G53D | - | - | 158NYT | - |
| A/Guizhou-liuzhite/313/2022 | 2022 | 3C.2a1b.2a.1a | - | N159Y,I160T,N190D | G53D | - | - | 158NYT | - |
| A/Guizhou-Liuzhite/327/2022 | 2022 | 3C.2a1b.2a.1a | - | N159Y,I160T,N190D | G53D | - | - | 158NYT | - |
| A/Guizhou-Qinglong/316/2022 | 2022 | 3C.2a1b.2a.1a | - | N159Y,I160K,I160T,N190D | G53D | - | - | - | - |
| Supplementary Table S2 continues on the next page. | | | | | | | | | |
| Supplementary Table S2 continued. | | | | | | | | | |
| Strain ID | Year | Clade | Antigenic site | | | | | Glycosylation site | |
| A | B | C | D | E | increase | deletion |
|  |  |  |  |  |  |  |  |  |  |
| A/Guizhou-Yilongxin/31/2022 | 2022 | 3C.2a1b.2a.1a | - | N158K,N159Y,I160T,N190D | G53D | - | - | - | - |
| A/Guizhou-liuzhite/321/2022 | 2022 | 3C.2a1b.2a.1a | - | N159Y,I160T,N190D | G53D | - | - | 158NYT | - |
| A/Guizhou-liuzhite/329/2022 | 2022 | 3C.2a1b.2a.1a | - | N159Y,I160T,N190D | G53D | - | - | 158NYT | - |
| A/Guizhou-xinyi/1752/2022 | 2022 | 3C.2a1b.2a.1a | - | N159Y,I160T,N190D | G53D | - | - | 158NYT | - |
| A/Guizhou-xinyi/1756/2022 | 2022 | 3C.2a1b.2a.1a | - | N159Y,I160T,N190D | G53D | - | - | 158NYT | - |
| A/Guizhou-xinyi/1723/2022 | 2022 | 3C.2a1b.2a.1a | - | N159Y,I160T,N190D | G53D | - | - | 158NYT | - |
| A/Guizhou-Guanlingbuyizumiaozuzizhi/352/2022 | 2022 | 3C.2a1b.2a.1a | - | N159Y,I160T,N190D | G53D | - | - | 158NYT | - |
| A/Guizhou-xinyi/1721/2022 | 2022 | 3C.2a1b.2a.1a | - | N159Y,I160T,N190D | G53D | - | - | 158NYT | - |
| A/Guizhou-xinyi/1779/2022 | 2022 | 3C.2a1b.2a.1a | - | N159Y,I160T,N190D | G53D | - | - | 158NYT | - |
| A/Guizhou-Liuzhite/324/2022 | 2022 | 3C.2a1b.2a.1a | - | N159Y,I160T,N190D | G53D | - | - | 158NYT | - |
| A/Guizhou-Xixiu/1445/2022 | 2022 | 3C.2a1b.2a.1a | - | N159Y,I160T,N190D | G53D | - | - | 158NYT | - |
| A/Guizhou-Douyun/1738/2022 | 2022 | 3C.2a1b.2a.1a | - | N159Y,I160T,N190D | G53D | - | - | 158NYT | - |

| **Supplementary Table S3. Complete list of amino acid substitutions and glycosylation site variation in influenza B Victoria(BV) viruses** | | | | | | | | |
| --- | --- | --- | --- | --- | --- | --- | --- | --- |
| Strain ID | Year | Clade | Antigenic site | | | | Glycosylatio-n site | |
| 120 loop | 150 loop | 160 loop | 190 helix | Incre-ase | Delet-ion |
| A/Guizhou-Douyun/1209/2019 | 2019 | 3C.2a2 | G142K | S159Y,S193F | - | - | - | - |
| A/Guizhou-Kaili/1832/2019 | 2019 | 3C.2a2 | G142K | S159Y,S193F | - | - | - | - |
| A/Guizhou-Nanming/1958/2018 | 2018 | 3C.2a2 | G142K | K160T,P194L | - | - | - | - |
| A/Guizhou-Zhongshan/124/2017 | 2017 | 3C.2a2 | R142K | K160T,P194L | - | - | - | - |
| A/Guizhou-Honghuagang/1808/2017 | 2017 | 3C.2a3 | T135K,S144K | K160T,P194L | - | - | - | 158NYT |
| A/Guizhou-Huichuan/1636/2017 | 2017 | 3C.2a3 | T135K,S144K | K160T,P194L | - | - | - | - |
| A/Guizhou-Xixiu/1777/2017 | 2017 | 3C.2a3 | T135K,R142S,S144K | K160T,P194L | - | - | - | - |
| A/Guizhou-Nanming/12448/2017 | 2017 | 3C.2a3 | T135K,R142G,S144K | K160T,P194L | - | - | - | - |
| A/Guizhou-Xinyi/11038/2017 | 2017 | 3C.2a3 | T135K,R142G,S144K | K160T,P194L | - | - | - | 158NYT |
| A/Guizhou-Zunyi/11038/2017 | 2017 | 3C.2a3 | T135K,S144K | P194L | - | - | - | - |
| A/Guizhou-Douyun/1790/2017 | 2017 | 3C.2a1 | T135N | P194L | - | - | - | - |
| A/Guizhou-Qixinguan/334/2019 | 2019 | 3C.2a1b.1b | S137F,T135K | S159Y,K160T | - | - | - | 158NYT |
| A/Guizhou/34/2019 | 2019 | 3C.2a1b.1b | S137F,T135K | S159Y | D53N | - | - | - |
| A/Guizhou-Honghuagang/325/2019 | 2019 | 3C.2a1b.1b | S137F,T135K | S159Y | D53N | - | - | - |
| A/Guizhou-Bijiang/1418/2019 | 2019 | 3C.2a1b.1b | S137F,T135K | S159Y,K160T | - | - | - | 158NYT |
| A/Guizhou-Bijiang/1351/2019 | 2019 | 3C.2a1b.1b | S137F,T135K | S159Y,K160T | - | - | - | 158NYT |
| A/Guizhou-Bijiang/1323/2019 | 2019 | 3C.2a1b.1b | S137F,T135K | N158K,S159Y,K160T | - | - | - | - |
| A/Guizhou-Xinyi/354/2019 | 2019 | 3C.2a1b.1b | S137F,T135K | S159Y,K160T | - | - | - | 158NYT |
| Supplementary Table S3 continues on the next page. | | | | | | | | |
| Supplementary Table S3 continued. | | | | | | | | |
| Strain ID | Year | Clade | Antigenic site | | | | Glycosylat-ion site | |
| 120 loop | 150 loop | 160 loop | 190 helix | Increa-se | Delet-ion |
| A/Guizhou-Kaili/15/2019 | 2019 | 3C.2a1b.2 | - | N158K,S159Y,K160T,S193F | - | - | - | - |
| A/Guizhou-Nanming/147/2019 | 2019 | 3C.2a1b.2 | - | S159Y,K160T,S193F | - | - | - | 158NYT |
| A/Guizhou-Nanming/132/2019 | 2019 | 3C.2a1b.2 | - | S159Y,K160T,S193F | - | - | - | 158NYT |
| A/Guizhou-Nanming/1139/2019 | 2019 | 3C.2a1b.2 | - | S159Y,K160T,S193F | - | - | - | 158NYT |
| A/Guizhou-Xixiu/11179/2018 | 2018 | 3C.2a1b.2 | - | P194L | - | - | - | - |
| A/Guizhou-Qingzhen/1110/2019 | 2019 | 3C.2a1b.2 | - | S159Y,K160I,S193F | - | - | - | - |
| A/Guizhou-Meitan/32/2023 | 2023 | 3C.2a1b.2a.2a.3a.1 | I140K | S156H,I192F,S198P | G53N | - | - | 94NSS |
| A/Guizhou-Meitan/311/2023 | 2023 | 3C.2a1b.2a.2a.3a.1 | I140K | S156H,I192F,S198P | G53N | - | - | 94NSS |
| A/Guizhou-Nanming/325/2023 | 2023 | 3C.2a1b.2a.2a.3a.1 | I140K | S156H,I192F,S198P | G53N | - | - | 94NSS |
| A/Guizhou-Nanming/3181/2023 | 2023 | 3C.2a1b.2a.2a.3a.1 | I140K | S156H,I192F,S198P | G53N | - | - | 94NSS |
| A/Guizhou-Douyun/1230/2023 | 2023 | 3C.2a1b.2a.2a.3a.1 | I140K | S156H,I192F,S198P | G53N | - | - | 94NSS |
| A/Guizhou-jinping/325/2022 | 2022 | 3C.2a1b.2a.1a | - | N159Y,I160T,N190D | G53D | - | - | 158NYT |
| A/Guizhou-congjiang/311/2022 | 2022 | 3C.2a1b.2a.1a | - | N159Y,I160T,N190D | G53D | - | - | 158NYT |
| A/Guizhou-jinping/318/2022 | 2022 | 3C.2a1b.2a.1a | - | N159Y,I160T,N190D | G53D | - | - | 158NYT |
| Supplementary Table S3 continues on the next page. | | | | | | | | |
| Supplementary Table S3 continued. | | | | | | | | |
| Strain ID | Year | Clade | Antigenic site | | | | Glycosylat-ion site | |
| 120 loop | 150 loop | 160 loop | 190 helix | Increa-se | Delet-ion |
| A/Guizhou-jinping/324/2022 | 2022 | 3C.2a1b.2a.1a | - | N159Y,I160T,N190D | G53D | - | - | 158NYT |
| A/Guizhou-Kaili/1540/2022 | 2022 | 3C.2a1b.2a.1a | - | N159Y,I160T,N190D | G53D | - | - | 158NYT |
| A/Guizhou-kaili/1352/2022 | 2022 | 3C.2a1b.2a.1a | - | N159Y,I160T,N190D | G53D | - | - | 158NYT |
| A/Guizhou-congjiang/314/2022 | 2022 | 3C.2a1b.2a.1a | - | N159Y,I160T,N190D | G53D | - | - | 158NYT |
| A/Guizhou-congjiang/39/2022 | 2022 | 3C.2a1b.2a.1a | - | N159Y,I160T,N190D | G53D | - | - | 158NYT |
| A/Guizhou-congjiang/313/2022 | 2022 | 3C.2a1b.2a.1a | - | N159Y,I160T,N190D | G53D | - | - | 158NYT |
| A/Guizhou-kaili/1363/2022 | 2022 | 3C.2a1b.2a.1a | - | N159Y,I160T,N190D | G53D | - | - | 158NYT |
| A/Guizhou-kaili/1360/2022 | 2022 | 3C.2a1b.2a.1a | S143A | N159Y,I160T,N190D | G53D | - | - | 158NYT |
| A/Guizhou-kaili/1361/2022 | 2022 | 3C.2a1b.2a.1a | S143A | N159Y,I160T,N190D | G53D | - | - | 158NYT |
| A/Guizhou-Zhongshan/1677/2022 | 2022 | 3C.2a1b.2a.1a | - | N158K,N159Y,I160T,N190D | G53D | - | - | - |
| A/Guizhou-jinping/322/2022 | 2022 | 3C.2a1b.2a.1a | - | N159Y,I160T,N190D | G53D | - | - | 158NYT |
| A/Guizhou-congjiang/312/2022 | 2022 | 3C.2a1b.2a.1a | - | N159Y,I160T,N190D | G53D | - | - | 158NYT |
| A/Guizhou-Zhongshan/1680/2022 | 2022 | 3C.2a1b.2a.1a | - | N159Y,I160T,N190D | G53D | - | - | 158NYT |
| A/Guizhou-jinping/323/2022 | 2022 | 3C.2a1b.2a.1a | - | N159Y,I160T,N190D | G53D | - | - | 158NYT |
| A/Guizhou-kaili/1358/2022 | 2022 | 3C.2a1b.2a.1a | - | N159Y,I160T,N190D | G53D | - | - | 158NYT |
| Supplementary Table S3 continues on the next page. | | | | | | | | |
| Supplementary Table S3 continued. | | | | | | | | |
| Strain ID | Year | Clade | Antigenic site | | | | Glycosylatio-n site | |
| 120 loop | 150 loop | 160 loop | 190 helix | Incre-ase | Delet-ion |
| A/Guizhou-kaili/1355/2022 | 2022 | 3C.2a1b.2a.1a | - | N159Y,I160T,N190D | G53D | - | - | 158NYT |
| A/Guizhou-Kaili/1565/2022 | 2022 | 3C.2a1b.2a.1a | - | N159Y,I160T,N190D | G53D | - | - | 158NYT |
| A/Guizhou-Guanlingbuyizumiaozuzizhi/340/2022 | 2022 | 3C.2a1b.2a.1a | - | N159Y,I160T,N190D | G53D | - | - | 158NYT |
| A/Guizhou-Anlong/319/2022 | 2022 | 3C.2a1b.2a.1a | - | N159Y,I160T,N190D | G53D | - | - | 158NYT |
| A/Guizhou-xinyi/1728/2022 | 2022 | 3C.2a1b.2a.1a | - | N159Y,I160T,N190D | G53D | - | - | 158NYT |
| A/Guizhou-Liuzhite/315/2022 | 2022 | 3C.2a1b.2a.1a | - | N159Y,I160T,N190D | G53D | - | - | 158NYT |
| A/Guizhou-Zhongshan/1533/2022 | 2022 | 3C.2a1b.2a.1a | - | N159Y,I160T,N190D | G53D | - | - | 158NYT |
| A/Guizhou-xinyi/1769/2022 | 2022 | 3C.2a1b.2a.1a | - | N159Y,I160T,N190D | G53D | - | - | 158NYT |
| A/Guizhou-Liuzhite/326/2022 | 2022 | 3C.2a1b.2a.1a | - | N159Y,I160T,N190D | G53D | - | - | - |
| A/Guizhou-xinyi/1766/2022 | 2022 | 3C.2a1b.2a.1a | - | N159Y,I160T,N190D | G53D | - | - | 158NYT |
| A/Guizhou-xinyi/1759/2022 | 2022 | 3C.2a1b.2a.1a | - | N159Y,I160T,N190D | G53D | - | - | 158NYT |
| A/Guizhou-Xixiu/31/2022 | 2022 | 3C.2a1b.2a.1a | - | N159Y,I160T,N190D | G53D | - | - | 158NYT |
| A/Guizhou-Guanlingbuyizumiaozuzizhi/326/2022 | 2022 | 3C.2a1b.2a.1a | - | N159Y,I160T,N190D | G53D | - | - | 158NYT |
| A/Guizhou-xinyi/1727/2022 | 2022 | 3C.2a1b.2a.1a | - | N159Y,I160T,N190D | G53D | - | - | 158NYT |
| A/Guizhou-liuzhite/320/2022 | 2022 | 3C.2a1b.2a.1a | - | N159Y,I160T,N190D | G53D | - | - | 158NYT |
| A/Guizhou-Liuzhite/311/2022 | 2022 | 3C.2a1b.2a.1a | - | N159Y,I160T,N190D | G53D | - | - | - |
| Supplementary Table S3 continues on the next page. | | | | | | | | |
| Supplementary Table S3 continued. | | | | | | | | |
| Strain ID | Year | Clade | Antigenic site | | | | Glycosylatio-n site | |
| 120 loop | 150 loop | 160 loop | 190 helix | Incre-ase | Delet-ion |
| A/Guizhou-liuzhite/317/2022 | 2022 | 3C.2a1b.2a.1a | - | N159Y,I160T,N190D | G53D | - | - | 158NYT |
| A/Guizhou-Liuzhite/343/2022 | 2022 | 3C.2a1b.2a.1a | - | N159Y,I160T,N190D | G53D | - | - | - |
| A/Guizhou-Liuzhite/318/2022 | 2022 | 3C.2a1b.2a.1a | - | N159Y,I160T,N190D | G53D | - | - | 158NYT |
| A/Guizhou-liuzhite/312/2022 | 2022 | 3C.2a1b.2a.1a | - | N159Y,I160T,N190D | G53D | - | - | 158NYT |
| A/Guizhou-liuzhite/323/2022 | 2022 | 3C.2a1b.2a.1a | - | N159Y,I160T,N190D | G53D | - | - | 158NYT |
| A/Guizhou-Liuzhite/328/2022 | 2022 | 3C.2a1b.2a.1a | - | N159Y,I160T,N190D | G53D | - | - | 158NYT |
| A/Guizhou-Liuzhite/325/2022 | 2022 | 3C.2a1b.2a.1a | - | N159Y,I160T,N190D | G53D | - | - | 158NYT |
| A/Guizhou-xinyi/1715/2022 | 2022 | 3C.2a1b.2a.1a | - | N159Y,I160T,N190D | G53D | - | - | 158NYT |
| A/Guizhou-liuzhite/313/2022 | 2022 | 3C.2a1b.2a.1a | - | N159Y,I160T,N190D | G53D | - | - | 158NYT |
| A/Guizhou-Liuzhite/327/2022 | 2022 | 3C.2a1b.2a.1a | - | N159Y,I160T,N190D | G53D | - | - | 158NYT |
| A/Guizhou-Qinglong/316/2022 | 2022 | 3C.2a1b.2a.1a | - | N159Y,I160K,I160T,N190D | G53D | - | - | - |
| A/Guizhou-Yilongxin/31/2022 | 2022 | 3C.2a1b.2a.1a | - | N158K,N159Y,I160T,N190D | G53D | - | - | - |
| A/Guizhou-liuzhite/321/2022 | 2022 | 3C.2a1b.2a.1a | - | N159Y,I160T,N190D | G53D | - | - | 158NYT |
| A/Guizhou-liuzhite/329/2022 | 2022 | 3C.2a1b.2a.1a | - | N159Y,I160T,N190D | G53D | - | - | 158NYT |
| A/Guizhou-xinyi/1752/2022 | 2022 | 3C.2a1b.2a.1a | - | N159Y,I160T,N190D | G53D | - | - | 158NYT |
| Supplementary Table S3 continues on the next page. | | | | | | | | |
| Supplementary Table S3 continued. | | | | | | | | |
| Strain ID | Year | Clade | Antigenic site | | | | Glycosylatio-n site | |
| 120 loop | 150 loop | 160 loop | 190 helix | Incre-ase | Delet-ion |
| A/Guizhou-xinyi/1756/2022 | 2022 | 3C.2a1b.2a.1a | - | N159Y,I160T,N190D | G53D | - | - | 158NYT |
| A/Guizhou-xinyi/1723/2022 | 2022 | 3C.2a1b.2a.1a | - | N159Y,I160T,N190D | G53D | - | - | 158NYT |
| A/Guizhou-Guanlingbuyizumiaozuzizhi/352/2022 | 2022 | 3C.2a1b.2a.1a | - | N159Y,I160T,N190D | G53D | - | - | 158NYT |
| A/Guizhou-xinyi/1721/2022 | 2022 | 3C.2a1b.2a.1a | - | N159Y,I160T,N190D | G53D | - | - | 158NYT |
| A/Guizhou-xinyi/1779/2022 | 2022 | 3C.2a1b.2a.1a | - | N159Y,I160T,N190D | G53D | - | - | 158NYT |
| A/Guizhou-Liuzhite/324/2022 | 2022 | 3C.2a1b.2a.1a | - | N159Y,I160T,N190D | G53D | - | - | 158NYT |
| A/Guizhou-Xixiu/1445/2022 | 2022 | 3C.2a1b.2a.1a | - | N159Y,I160T,N190D | G53D | - | - | 158NYT |
| A/Guizhou-Douyun/1738/2022 | 2022 | 3C.2a1b.2a.1a | - | N159Y,I160T,N190D | G53D | - | - | 158NYT |
| A/Guizhou-Douyun/1209/2019 | 2019 | 3C.2a2 | G142K | S159Y,S193F | - | - | - | - |
| A/Guizhou-Kaili/1832/2019 | 2019 | 3C.2a2 | G142K | S159Y,S193F | - | - | - | - |
| A/Guizhou-Nanming/1958/2018 | 2018 | 3C.2a2 | G142K | K160T,P194L | - | - | - | - |
| A/Guizhou-Zhongshan/124/2017 | 2017 | 3C.2a2 | R142K | K160T,P194L | - | - | - | - |
| A/Guizhou-Honghuagang/1808/2017 | 2017 | 3C.2a3 | T135K,S144K | K160T,P194L | - | - | - | 158NYT |
| A/Guizhou-Huichuan/1636/2017 | 2017 | 3C.2a3 | T135K,S144K | K160T,P194L | - | - | - | - |
| A/Guizhou-Xixiu/1777/2017 | 2017 | 3C.2a3 | T135K,R142S,S144K | K160T,P194L | - | - | - | - |
| A/Guizhou-Nanming/12448/2017 | 2017 | 3C.2a3 | T135K,R142G,S144K | K160T,P194L | - | - | - | - |
| A/Guizhou-Xinyi/11038/2017 | 2017 | 3C.2a3 | T135K,R142G,S144K | K160T,P194L | - | - | - | 158NYT |
| A/Guizhou-Zunyi/11038/2017 | 2017 | 3C.2a3 | T135K,S144K | P194L | - | - | - | - |
| Supplementary Table S3 continues on the next page. | | | | | | | | |
| Supplementary Table S3 continued. | | | | | | | | |
| Strain ID | Year | Clade | Antigenic site | | | | Glycosylatio-n site | |
| 120 loop | 150 loop | 160 loop | 190 helix | Incre-ase | Delet-ion |
| A/Guizhou-Douyun/1790/2017 | 2017 | 3C.2a1 | T135N | P194L | - | - | - | - |
| A/Guizhou-Qixinguan/334/2019 | 2019 | 3C.2a1b.1b | S137F,T135K | S159Y,K160T | - | - | - | 158NYT |
| A/Guizhou/34/2019 | 2019 | 3C.2a1b.1b | S137F,T135K | S159Y | D53N | - | - | - |
| A/Guizhou-Honghuagang/325/2019 | 2019 | 3C.2a1b.1b | S137F,T135K | S159Y | D53N | - | - | - |
| A/Guizhou-Bijiang/1418/2019 | 2019 | 3C.2a1b.1b | S137F,T135K | S159Y,K160T | - | - | - | 158NYT |
| A/Guizhou-Bijiang/1351/2019 | 2019 | 3C.2a1b.1b | S137F,T135K | S159Y,K160T | - | - | - | 158NYT |
| A/Guizhou-Bijiang/1323/2019 | 2019 | 3C.2a1b.1b | S137F,T135K | N158K,S159Y,K160T | - | - | - | - |
| A/Guizhou-Xinyi/354/2019 | 2019 | 3C.2a1b.1b | S137F,T135K | S159Y,K160T | - | - | - | 158NYT |
| A/Guizhou-Kaili/15/2019 | 2019 | 3C.2a1b.2 | - | N158K,S159Y,K160T,S193F | - | - | - | - |
| A/Guizhou-Nanming/147/2019 | 2019 | 3C.2a1b.2 | - | S159Y,K160T,S193F | - | - | - | 158NYT |
| A/Guizhou-Nanming/132/2019 | 2019 | 3C.2a1b.2 | - | S159Y,K160T,S193F | - | - | - | 158NYT |
| A/Guizhou-Nanming/1139/2019 | 2019 | 3C.2a1b.2 | - | S159Y,K160T,S193F | - | - | - | 158NYT |
| A/Guizhou-Xixiu/11179/2018 | 2018 | 3C.2a1b.2 | - | P194L | - | - | - | - |
| A/Guizhou-Qingzhen/1110/2019 | 2019 | 3C.2a1b.2 | - | S159Y,K160I,S193F | - | - | - | - |
| A/Guizhou-Meitan/32/2023 | 2023 | 3C.2a1b.2a.2a.3a.1 | I140K | S156H,I192F,S198P | G53N | - | - | 94NSS |
| Supplementary Table S3 continues on the next page. | | | | | | | | |
| Supplementary Table S3 continued. | | | | | | | | |
| Strain ID | Year | Clade | Antigenic site | | | | Glycosylatio-n site | |
| 120 loop | 150 loop | 160 loop | 190 helix | Incre-ase | Delet-ion |
| A/Guizhou-Meitan/311/2023 | 2023 | 3C.2a1b.2a.2a.3a.1 | I140K | S156H,I192F,S198P | G53N | - | - | 94NSS |
| A/Guizhou-Nanming/325/2023 | 2023 | 3C.2a1b.2a.2a.3a.1 | I140K | S156H,I192F,S198P | G53N | - | - | 94NSS |
| A/Guizhou-Nanming/3181/2023 | 2023 | 3C.2a1b.2a.2a.3a.1 | I140K | S156H,I192F,S198P | G53N | - | - | 94NSS |
| A/Guizhou-Douyun/1230/2023 | 2023 | 3C.2a1b.2a.2a.3a.1 | I140K | S156H,I192F,S198P | G53N | - | - | 94NSS |
| A/Guizhou-jinping/325/2022 | 2022 | 3C.2a1b.2a.1a | - | N159Y,I160T,N190D | G53D | - | - | 158NYT |
| A/Guizhou-congjiang/311/2022 | 2022 | 3C.2a1b.2a.1a | - | N159Y,I160T,N190D | G53D | - | - | 158NYT |
| A/Guizhou-jinping/318/2022 | 2022 | 3C.2a1b.2a.1a | - | N159Y,I160T,N190D | G53D | - | - | 158NYT |
| A/Guizhou-jinping/324/2022 | 2022 | 3C.2a1b.2a.1a | - | N159Y,I160T,N190D | G53D | - | - | 158NYT |
| A/Guizhou-Kaili/1540/2022 | 2022 | 3C.2a1b.2a.1a | - | N159Y,I160T,N190D | G53D | - | - | 158NYT |
| A/Guizhou-kaili/1352/2022 | 2022 | 3C.2a1b.2a.1a | - | N159Y,I160T,N190D | G53D | - | - | 158NYT |
| A/Guizhou-congjiang/314/2022 | 2022 | 3C.2a1b.2a.1a | - | N159Y,I160T,N190D | G53D | - | - | 158NYT |
| A/Guizhou-congjiang/39/2022 | 2022 | 3C.2a1b.2a.1a | - | N159Y,I160T,N190D | G53D | - | - | 158NYT |
| A/Guizhou-congjiang/313/2022 | 2022 | 3C.2a1b.2a.1a | - | N159Y,I160T,N190D | G53D | - | - | 158NYT |
| A/Guizhou-kaili/1363/2022 | 2022 | 3C.2a1b.2a.1a | - | N159Y,I160T,N190D | G53D | - | - | 158NYT |
| A/Guizhou-kaili/1360/2022 | 2022 | 3C.2a1b.2a.1a | S143A | N159Y,I160T,N190D | G53D | - | - | 158NYT |
| A/Guizhou-kaili/1361/2022 | 2022 | 3C.2a1b.2a.1a | S143A | N159Y,I160T,N190D | G53D | - | - | 158NYT |
| Supplementary Table S3 continues on the next page. | | | | | | | | |
| Supplementary Table S3 continued. | | | | | | | | |
| Strain ID | Year | Clade | Antigenic site | | | | Glycosylatio-n site | |
| 120 loop | 150 loop | 160 loop | 190 helix | Incre-ase | Delet-ion |
| A/Guizhou-Zhongshan/1677/2022 | 2022 | 3C.2a1b.2a.1a | - | N158K,N159Y,I160T,N190D | G53D | - | - | - |
| A/Guizhou-jinping/322/2022 | 2022 | 3C.2a1b.2a.1a | - | N159Y,I160T,N190D | G53D | - | - | 158NYT |
| A/Guizhou-congjiang/312/2022 | 2022 | 3C.2a1b.2a.1a | - | N159Y,I160T,N190D | G53D | - | - | 158NYT |
| A/Guizhou-Zhongshan/1680/2022 | 2022 | 3C.2a1b.2a.1a | - | N159Y,I160T,N190D | G53D | - | - | 158NYT |
| A/Guizhou-jinping/323/2022 | 2022 | 3C.2a1b.2a.1a | - | N159Y,I160T,N190D | G53D | - | - | 158NYT |
| A/Guizhou-kaili/1358/2022 | 2022 | 3C.2a1b.2a.1a | - | N159Y,I160T,N190D | G53D | - | - | 158NYT |
| A/Guizhou-kaili/1355/2022 | 2022 | 3C.2a1b.2a.1a | - | N159Y,I160T,N190D | G53D | - | - | 158NYT |
| A/Guizhou-Kaili/1565/2022 | 2022 | 3C.2a1b.2a.1a | - | N159Y,I160T,N190D | G53D | - | - | 158NYT |
| A/Guizhou-Guanlingbuyizumiaozuzizhi/340/2022 | 2022 | 3C.2a1b.2a.1a | - | N159Y,I160T,N190D | G53D | - | - | 158NYT |
| A/Guizhou-Anlong/319/2022 | 2022 | 3C.2a1b.2a.1a | - | N159Y,I160T,N190D | G53D | - | - | 158NYT |
| A/Guizhou-xinyi/1728/2022 | 2022 | 3C.2a1b.2a.1a | - | N159Y,I160T,N190D | G53D | - | - | 158NYT |
| A/Guizhou-Liuzhite/315/2022 | 2022 | 3C.2a1b.2a.1a | - | N159Y,I160T,N190D | G53D | - | - | 158NYT |
| A/Guizhou-Zhongshan/1533/2022 | 2022 | 3C.2a1b.2a.1a | - | N159Y,I160T,N190D | G53D | - | - | 158NYT |
| A/Guizhou-xinyi/1769/2022 | 2022 | 3C.2a1b.2a.1a | - | N159Y,I160T,N190D | G53D | - | - | 158NYT |
| A/Guizhou-Liuzhite/326/2022 | 2022 | 3C.2a1b.2a.1a | - | N159Y,I160T,N190D | G53D | - | - | - |
| Supplementary Table S3 continues on the next page. | | | | | | | | |
| Supplementary Table S3 continued. | | | | | | | | |
| Strain ID | Year | Clade | Antigenic site | | | | Glycosylatio-n site | |
| 120 loop | 150 loop | 160 loop | 190 helix | Incre-ase | Delet-ion |
| A/Guizhou-xinyi/1766/2022 | 2022 | 3C.2a1b.2a.1a | - | N159Y,I160T,N190D | G53D | - | - | 158NYT |
| A/Guizhou-xinyi/1759/2022 | 2022 | 3C.2a1b.2a.1a | - | N159Y,I160T,N190D | G53D | - | - | 158NYT |
| A/Guizhou-Xixiu/31/2022 | 2022 | 3C.2a1b.2a.1a | - | N159Y,I160T,N190D | G53D | - | - | 158NYT |
| A/Guizhou-Guanlingbuyizumiaozuzizhi/326/2022 | 2022 | 3C.2a1b.2a.1a | - | N159Y,I160T,N190D | G53D | - | - | 158NYT |
| A/Guizhou-xinyi/1727/2022 | 2022 | 3C.2a1b.2a.1a | - | N159Y,I160T,N190D | G53D | - | - | 158NYT |
| A/Guizhou-liuzhite/320/2022 | 2022 | 3C.2a1b.2a.1a | - | N159Y,I160T,N190D | G53D | - | - | 158NYT |
| A/Guizhou-Liuzhite/311/2022 | 2022 | 3C.2a1b.2a.1a | - | N159Y,I160T,N190D | G53D | - | - | - |
| A/Guizhou-liuzhite/317/2022 | 2022 | 3C.2a1b.2a.1a | - | N159Y,I160T,N190D | G53D | - | - | 158NYT |
| A/Guizhou-Liuzhite/343/2022 | 2022 | 3C.2a1b.2a.1a | - | N159Y,I160T,N190D | G53D | - | - | - |
| A/Guizhou-Liuzhite/318/2022 | 2022 | 3C.2a1b.2a.1a | - | N159Y,I160T,N190D | G53D | - | - | 158NYT |
| A/Guizhou-liuzhite/312/2022 | 2022 | 3C.2a1b.2a.1a | - | N159Y,I160T,N190D | G53D | - | - | 158NYT |
| A/Guizhou-liuzhite/323/2022 | 2022 | 3C.2a1b.2a.1a | - | N159Y,I160T,N190D | G53D | - | - | 158NYT |
| A/Guizhou-Liuzhite/328/2022 | 2022 | 3C.2a1b.2a.1a | - | N159Y,I160T,N190D | G53D | - | - | 158NYT |
| A/Guizhou-Liuzhite/325/2022 | 2022 | 3C.2a1b.2a.1a | - | N159Y,I160T,N190D | G53D | - | - | 158NYT |
| A/Guizhou-xinyi/1715/2022 | 2022 | 3C.2a1b.2a.1a | - | N159Y,I160T,N190D | G53D | - | - | 158NYT |
| A/Guizhou-liuzhite/313/2022 | 2022 | 3C.2a1b.2a.1a | - | N159Y,I160T,N190D | G53D | - | - | 158NYT |
| Supplementary Table S3 continues on the next page. | | | | | | | | |
| Supplementary Table S3 continued. | | | | | | | | |
| Strain ID | Year | Clade | Antigenic site | | | | Glycosylatio-n site | |
| 120 loop | 150 loop | 160 loop | 190 helix | Incre-ase | Delet-ion |
| A/Guizhou-Liuzhite/327/2022 | 2022 | 3C.2a1b.2a.1a | - | N159Y,I160T,N190D | G53D | - | - | 158NYT |
| A/Guizhou-Qinglong/316/2022 | 2022 | 3C.2a1b.2a.1a | - | N159Y,I160K,I160T,N190D | G53D | - | - | - |
| A/Guizhou-Yilongxin/31/2022 | 2022 | 3C.2a1b.2a.1a | - | N158K,N159Y,I160T,N190D | G53D | - | - | - |
| A/Guizhou-liuzhite/321/2022 | 2022 | 3C.2a1b.2a.1a | - | N159Y,I160T,N190D | G53D | - | - | 158NYT |
| A/Guizhou-liuzhite/329/2022 | 2022 | 3C.2a1b.2a.1a | - | N159Y,I160T,N190D | G53D | - | - | 158NYT |
| A/Guizhou-xinyi/1752/2022 | 2022 | 3C.2a1b.2a.1a | - | N159Y,I160T,N190D | G53D | - | - | 158NYT |
| A/Guizhou-xinyi/1756/2022 | 2022 | 3C.2a1b.2a.1a | - | N159Y,I160T,N190D | G53D | - | - | 158NYT |
| A/Guizhou-xinyi/1723/2022 | 2022 | 3C.2a1b.2a.1a | - | N159Y,I160T,N190D | G53D | - | - | 158NYT |
| A/Guizhou-Guanlingbuyizumiaozuzizhi/352/2022 | 2022 | 3C.2a1b.2a.1a | - | N159Y,I160T,N190D | G53D | - | - | 158NYT |
| A/Guizhou-xinyi/1721/2022 | 2022 | 3C.2a1b.2a.1a | - | N159Y,I160T,N190D | G53D | - | - | 158NYT |
| A/Guizhou-xinyi/1779/2022 | 2022 | 3C.2a1b.2a.1a | - | N159Y,I160T,N190D | G53D | - | - | 158NYT |
| A/Guizhou-Liuzhite/324/2022 | 2022 | 3C.2a1b.2a.1a | - | N159Y,I160T,N190D | G53D | - | - | 158NYT |
| A/Guizhou-Xixiu/1445/2022 | 2022 | 3C.2a1b.2a.1a | - | N159Y,I160T,N190D | G53D | - | - | 158NYT |
